# Supplementary material for: Self-Luminescing Theranostic Nanoreactors with Intraparticle Relayed Energy Transfer for Tumor Microenvironment Activated Imaging and Photodynamic Therapy
Source: PubMed Central journal article supplement — Theranostics. 2019 Jan 1;9(1):20–33. doi: 10.7150/thno.28857 (PMC6332793; doi:10.7150/thno.28857), 2019-01-01
Supplement: thnov09p0020s1.pdf [file thnov09p0020s1.pdf]

## Supporting Information

### Self-luminescing theranostic nanoreactors with intraparticle relayed energy transfer for tumor microenvironment activated imaging and photodynamic therapy

Ming Wu,<sup>ad</sup> Lingjie Wu,<sup>ad</sup> Jiong Li,<sup>acd</sup> Da Zhang,<sup>ad</sup> Shanyou Lan,<sup>abd</sup>  
Xiaolong Zhang,<sup>ad</sup> Xinyi Lin,<sup>ad</sup> Gang Liu,<sup>e</sup> Xiaolong Liu,<sup>\*acd</sup> and Jingfeng  
Liu<sup>\*abcd</sup>

<sup>a</sup> The United Innovation of Mengchao Hepatobiliary Technology Key Laboratory of Fujian Province, Mengchao Hepatobiliary Hospital of Fujian Medical University, Fuzhou 350025, P.R. China

<sup>b</sup> Liver Disease Center, The First Affiliated Hospital of Fujian Medical University, Fuzhou 350005, P. R. China

<sup>c</sup> Key Laboratory of Design and Assembly of Functional Nanostructures, Fujian Institute of Research on the Structure of Matter, Chinese Academy of Sciences, Fuzhou 350002, P.R. China.

<sup>d</sup> The Liver Center of Fujian Province, Fujian Medical University, Fuzhou 350025, P.R. China

<sup>e</sup> Center for Molecular Imaging and Translational Medicine, Xiamen University, Xiamen 361005, P. R. China

#### Corresponding Authors:

\*X. Liu. E-mail: xiaoloong.liu@gmail.com

\*J. Liu. E-mail: drjingfeng@126.com

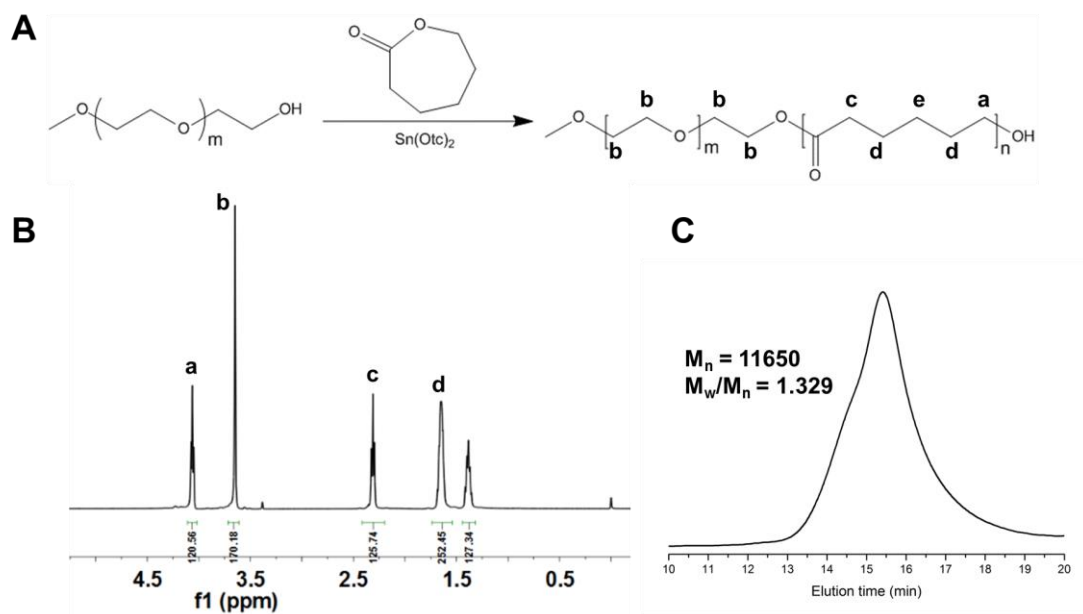

**Figure S1.** (A) Synthesis procedure of PEG-PCL. (B)  $^1\text{H}$  NMR spectrum of PEG-PCL. (C) GPC of PEG-PCL.

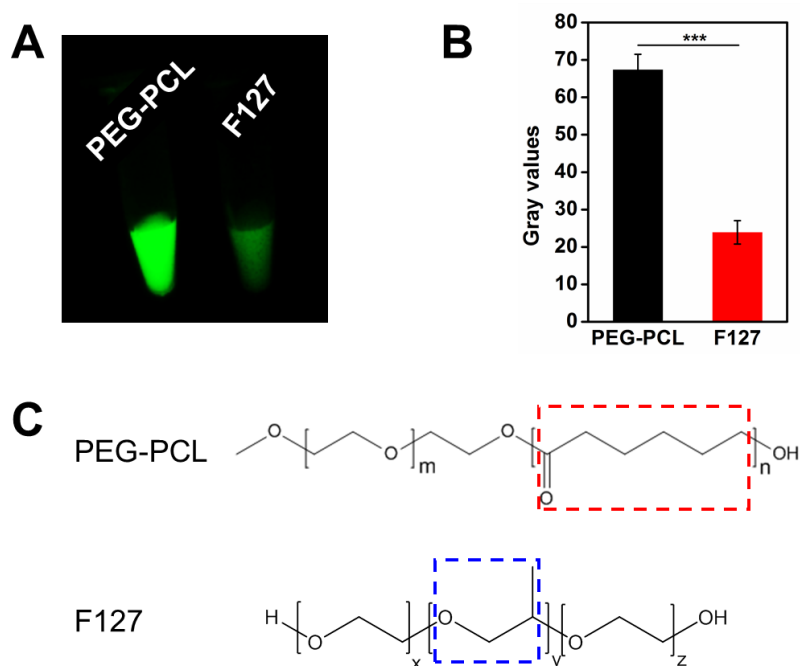

**Figure S2.** (A) Representative chemiluminescence images of PFPV-loaded PEG-PCL micelles or F127 micelles (1 mg/mL) with the addition of  $\text{H}_2\text{O}_2$  (10 mM). Chemiluminescence images were collected with a 5 min of exposure time with open filter using the ChemiDoc<sup>TM</sup> MP Imaging System (BIO-RAD). (B) Gray values of chemiluminescence images in Figure A calculated by Image J software. (C) Chemical structure of PEG-PCL and F127, in which the PCL segment and PPG segment were labeled in red and blue dashed box, respectively.

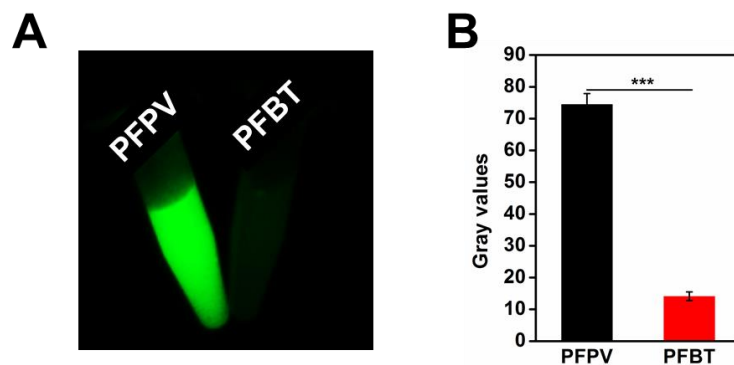

**Figure S3.** (A) Representative chemiluminescence images of PFPV or PFBT-loaded micelles (1 mg/mL) with the addition of H<sub>2</sub>O<sub>2</sub> (10 mM). Chemiluminescence images were collected with a 5 min of exposure time with open filter using the ChemiDoc™ MP Imaging System (BIO-RAD). (B) Gray values of chemiluminescence images in Figure A calculated by Image J software.

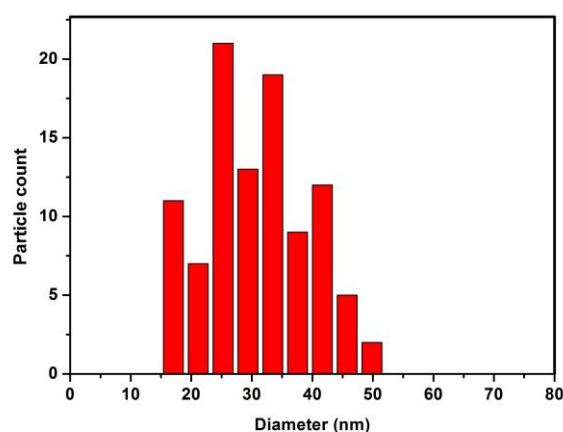

**Figure S4.** Size distribution of POCL measured from TEM images in Figure 1D.

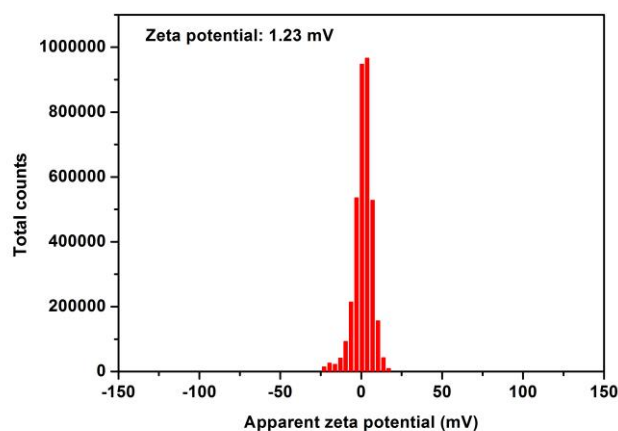

**Figure S5.** Zeta potential distribution of POCL.

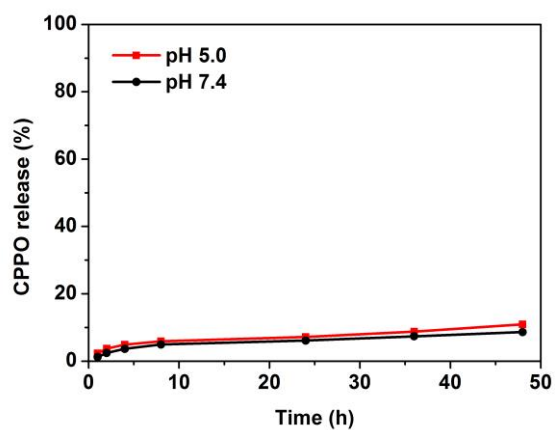

**Figure S6.** The release profiles of CPPO from POCL under different buffer conditions at pH 7.4 (PBS, 10 mM, 37 °C) and 5.0 (acetate buffer, 10 mM, 37 °C).

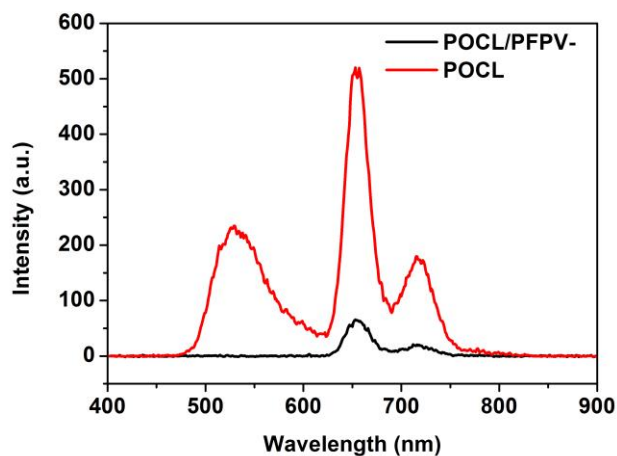

**Figure S7.** Chemiluminescence spectra of POCL and POCL/PFPV- by addition of excessive amount of H<sub>2</sub>O<sub>2</sub> (1 M).

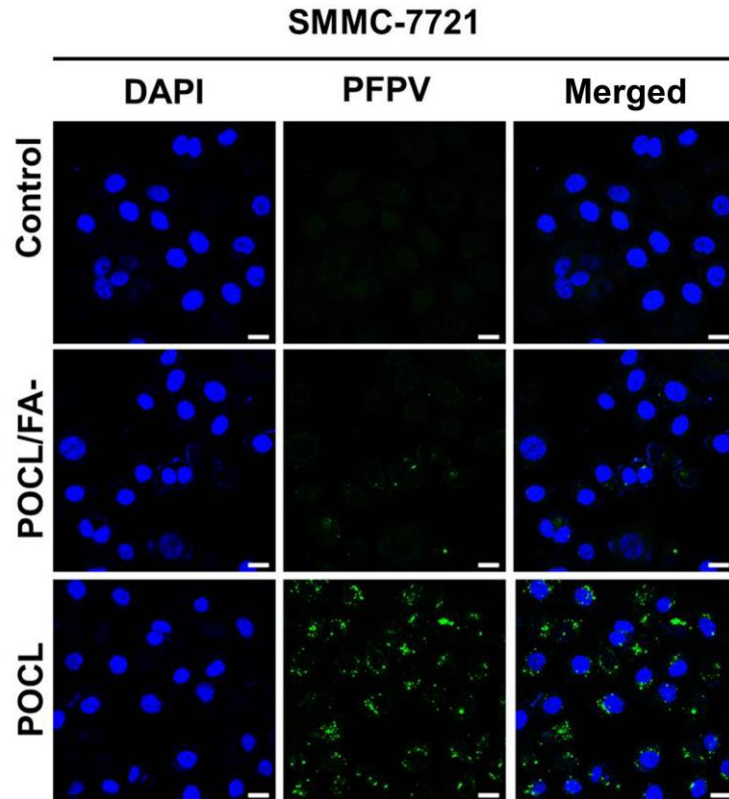

**Figure S8.** CLSM images of SMMC-7721 cells after incubation with POCL or POCL/FA- for 4 h. Scale bar = 20  $\mu$ m.

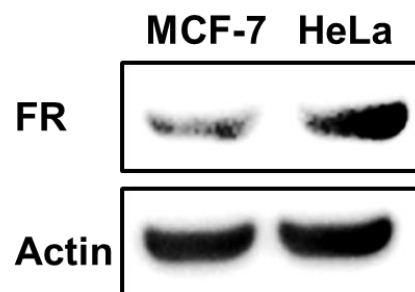

**Figure S9.** Western blot analysis of the folate receptor (FA) levels of MCF-7 and HeLa cells, using actin as a loading control.

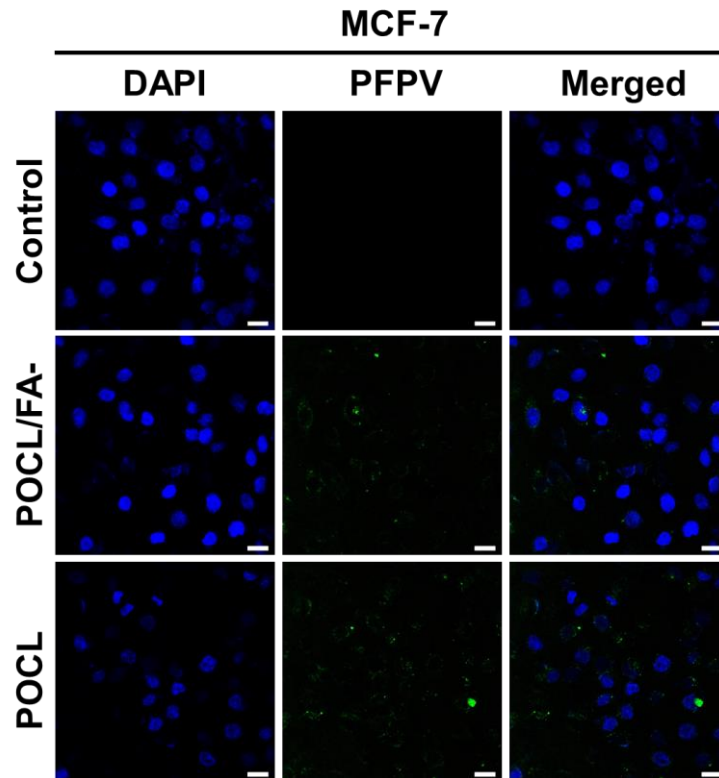

**Figure S10.** CLSM images of MCF-7 cells after incubation with POCL or POCL/FA- for 4 h. Scale bar = 20  $\mu\text{m}$ .

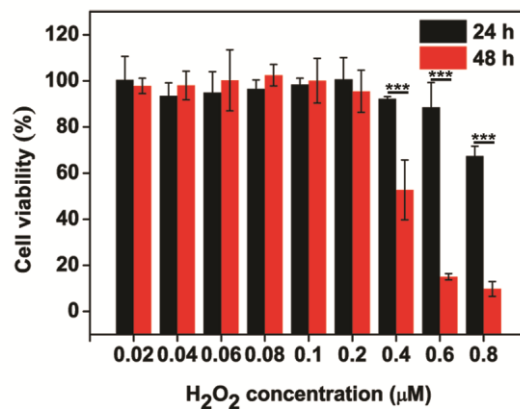

**Figure S11.** CCK8 assay of HeLa cells incubated with H<sub>2</sub>O<sub>2</sub> at various concentrations for 24 h or 48 h.

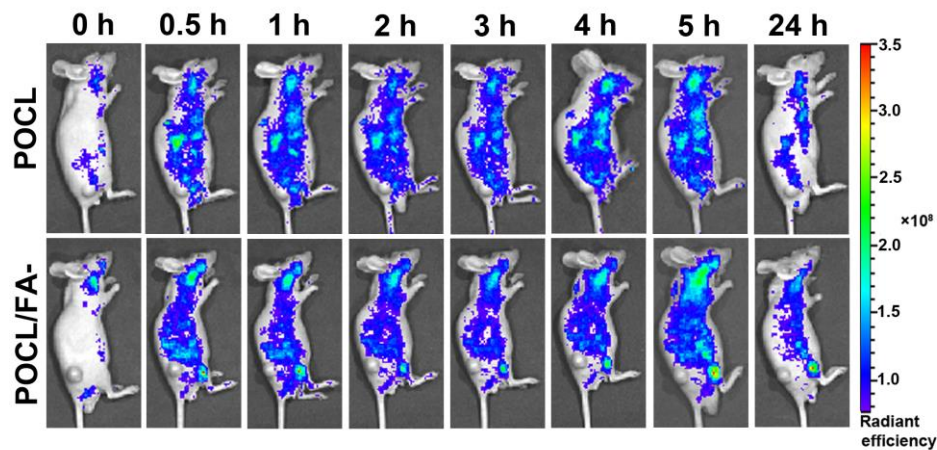

**Figure S12.** Time course fluorescence images of tumor-bearing mice receiving *i.v.* injection of POCL or POCL/FA- (0.2 mg/mL based on TPP, 100  $\mu$ L per mouse).

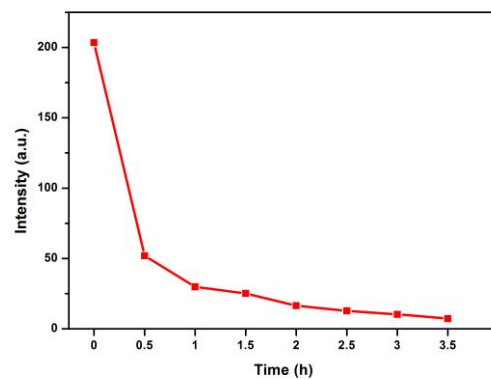

**Figure S13.** Chemiluminescence intensity of POCL after addition of excessive amount of  $H_2O_2$  (1 M) for different times.

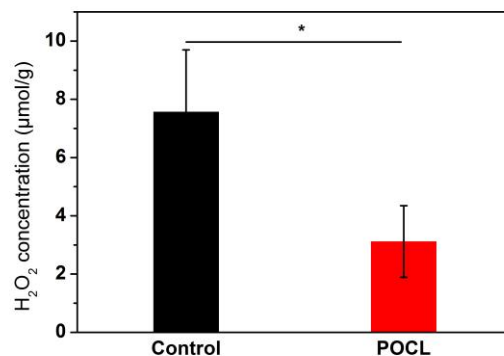

**Figure S14.** The change of  $H_2O_2$  concentrations in HeLa tumors after 1 hour of POCL injection. (\* $P < 0.05$ , \*\* $P < 0.01$ , \*\*\* $P < 0.001$ ;  $n = 3$  per group).

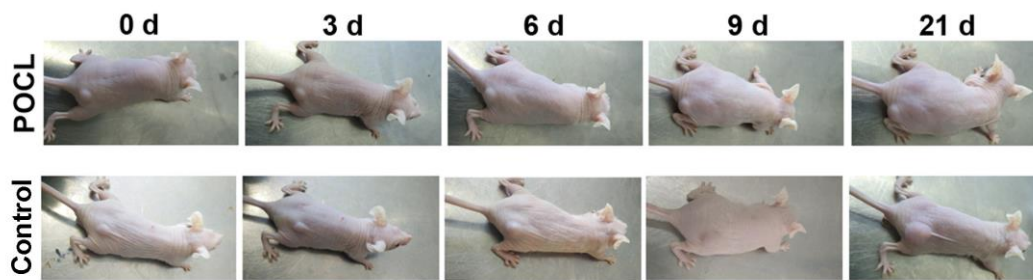

**Figure S15.** Photographs of the mouse taken before treatment (0 d), and at 3, 6, 9, 21 days after POCL treatments, while the mouse with saline injection was used as control.

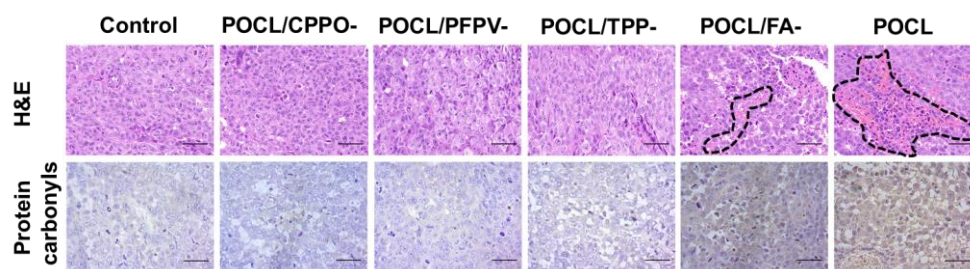

**Figure S16.** Optical microscopic images of tumor slices stained by H&E and protein carbonyls immunohistochemistry after 1 hour of nanoparticle injection. Scale bar = 50  $\mu\text{m}$ . The black dashed circles in H&E images indicated the haemorrhage region.

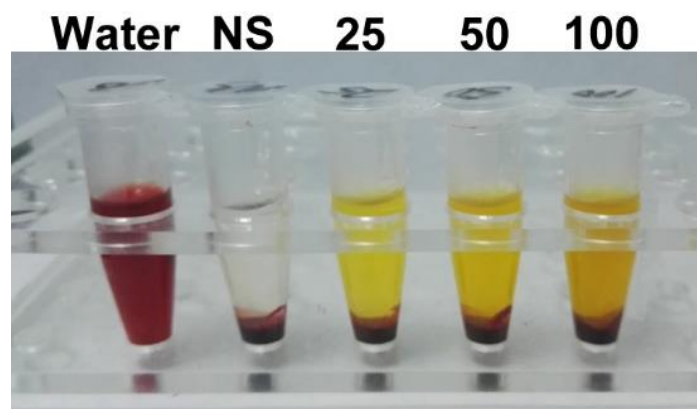

**Figure S17.** Photographs of RBC hemolysis assay with POCL at various concentrations, using water and normal physiological saline (NS) as the positive and negative controls, respectively.



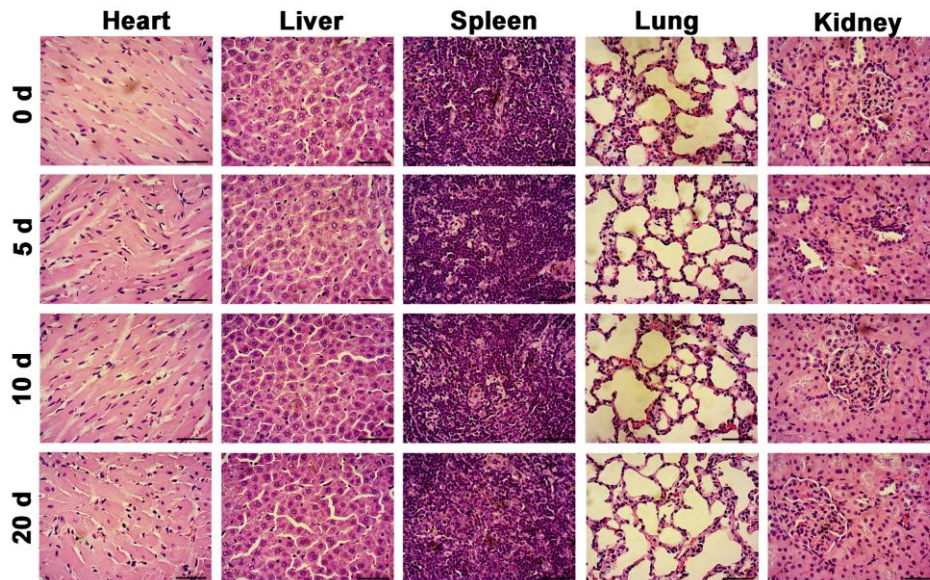

**Figure S18.** The pathological changes of main organs evaluated by H&E staining which were acquired at different time intervals post injection of POCL. Scale bar = 50 μm.

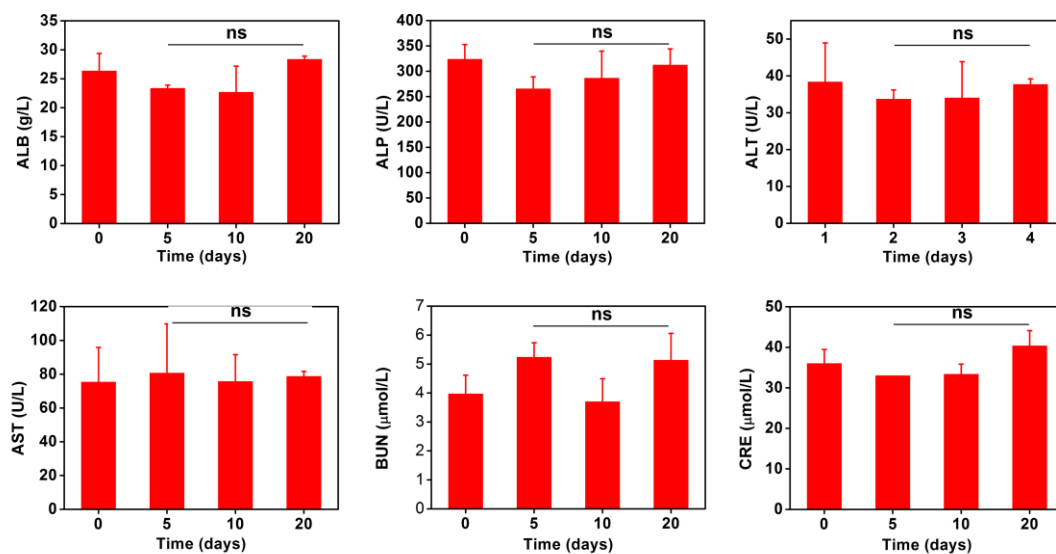

**Figure S19.** Blood biochemical parameters acquired at different time intervals post injection of POCL. Related blood biochemistry indicators: albumin (ALB), alkaline phosphatase (ALP), alanine aminotransferase (ALT), aspartate aminotransferase (AST), blood urea nitrogen (BUN) and creatinine (CRE).

## Reference

1. Pang Z, Lu W, Gao H, et al. Preparation and brain delivery property of biodegradable polymersomes conjugated with OX26. *J. Controlled Release.* 2008; 128: 120-7.
